# Supplementary material
Source: PubMed Central journal article supplement (PMC10196748)
Supplement: sj-pdf-1-jcb-10.1177_0271678X231153741.pdf [file sj-pdf-1-jcb-10.1177_0271678X231153741.pdf]

## Supplemental material

### **Cerebral Blood Flow and Cerebrovascular Resistance across the Adult Lifespan: A Multimodality Approach**

Tsubasa Tomoto <sup>1,2,3</sup>, Marilyn Lu <sup>3</sup>, Ayaz M. Khan <sup>4</sup>, Jie Liu <sup>5</sup>, Evan P. Pasha <sup>1,3</sup>,  
Takashi Tarumi <sup>1,2,3,6</sup>, Rong Zhang <sup>1,3,7</sup>

<sup>1</sup> Institute for Exercise and Environmental Medicine, Texas Health Presbyterian Hospital Dallas, Dallas, Texas, USA; <sup>2</sup> Human Informatics and Interaction Research Institute, National Institute of Advanced Industrial Science and Technology, Tsukuba, Ibaraki, Japan; <sup>3</sup> Department of Neurology, <sup>7</sup> Department of Internal Medicine, University of Texas Southwestern Medical Center, Dallas, Texas, USA; <sup>4</sup> Department of Diagnostic Imaging, St. Jude Children's Research Hospital, Memphis, Tennessee, USA, <sup>5</sup> Department of Pharmacology, Physiology and Neuroscience, Rutgers University, Newark, New Jersey, USA, <sup>6</sup> Graduate School of Comprehensive Human Sciences, University of Tsukuba, Tsukuba, Japan

**Running head:** Cerebral Blood Flow with Age

**Corresponding Author:** Rong Zhang, Ph.D.

Office Address: 7232 Greenville Ave, Dallas, TX 75231

Telephone: +1 (214) 345-4670 | Fax: +1 (214) 345-4618

E-mail: RongZhang@TexasHealth.org

**Table S1. Vascular resistance and pulsatility index measurements using color-coded duplex ultrasonography**

| Variables                         | <u>Young</u> |             | <u>Middle age</u> |              | <u>Old</u>  |               | <u>P-value</u> |       |              |
|-----------------------------------|--------------|-------------|-------------------|--------------|-------------|---------------|----------------|-------|--------------|
|                                   | Men          | Women       | Men               | Women        | Men         | Women         | Age            | Sex   | Age × Sex    |
| Vascular resistance (mmHg/mL/min) |              |             |                   |              |             |               |                |       |              |
| Left-ICA                          | 0.37 ± 0.09  | 0.34 ± 0.08 | 0.45 ± 0.13       | 0.46 ± 0.16* | 0.50 ± 0.12 | 0.50 ± 0.13*  | < <b>0.001</b> | 0.814 | 0.626        |
| Right-ICA                         | 0.38 ± 0.10  | 0.32 ± 0.06 | 0.41 ± 0.08       | 0.46 ± 0.12* | 0.47 ± 0.13 | 0.46 ± 0.13*  | < <b>0.001</b> | 0.927 | <b>0.026</b> |
| Left-VA                           | 1.19 ± 0.48  | 0.98 ± 0.47 | 1.43 ± 1.16       | 1.37 ± 0.72* | 1.51 ± 1.58 | 1.95 ± 1.84*  | <b>0.013</b>   | 0.756 | 0.284        |
| Right-VA                          | 1.66 ± 1.06  | 1.45 ± 0.86 | 2.36 ± 1.96       | 1.86 ± 0.99* | 1.79 ± 1.13 | 1.70 ± 1.02   | <b>0.046</b>   | 0.152 | 0.617        |
| Pulsatility index (a.u.)          |              |             |                   |              |             |               |                |       |              |
| Left-ICA                          | 0.86 ± 0.15  | 0.86 ± 0.13 | 0.86 ± 0.13       | 0.84 ± 0.14  | 1.07 ± 0.15 | 1.05 ± 0.15*† | < <b>0.001</b> | 0.531 | 0.875        |
| Right-ICA                         | 0.89 ± 0.12  | 0.85 ± 0.13 | 0.91 ± 0.11       | 0.88 ± 0.11  | 1.09 ± 0.17 | 1.05 ± 0.16*† | < <b>0.001</b> | 0.072 | 0.952        |
| Left-VA                           | 1.09 ± 0.19  | 1.06 ± 0.17 | 1.06 ± 0.25       | 1.08 ± 0.20  | 1.29 ± 0.27 | 1.31 ± 0.27*† | < <b>0.001</b> | 0.832 | 0.826        |
| Right-VA                          | 1.04 ± 0.21  | 1.21 ± 0.26 | 1.13 ± 0.30       | 1.13 ± 0.25  | 1.24 ± 0.26 | 1.27 ± 0.27*† | <b>0.013</b>   | 0.106 | 0.184        |

ICA: internal carotid artery; VA: vertebral artery. Data are mean ± standard deviation. Bold values represent  $p < 0.05$ . Results from one-way analysis of variance  $p < 0.05$  \* vs young;  $p < 0.05$  † vs. middle age.  $p < 0.05$  \* vs young;  $p < 0.05$  † vs. middle age.

**Table S2. Volumetric blood flow measurements using CDUS and PC-MRI**

| Variables                                                 | Young    |          | Middle age |           | Old      |            | p-value |       |         |
|-----------------------------------------------------------|----------|----------|------------|-----------|----------|------------|---------|-------|---------|
|                                                           | Men      | Women    | Men        | Women     | Men      | Women      | Age     | Sex   | Age×Sex |
| <i>Color-coded duplex ultrasonography (CDUS)</i>          |          |          |            |           |          |            |         |       |         |
| Volumetric blood flow (mL/min)                            |          |          |            |           |          |            |         |       |         |
| Left-ICA                                                  | 242 ± 48 | 242 ± 48 | 212 ± 42   | 207 ± 59* | 191 ± 38 | 184 ± 39*† | <0.001  | 0.566 | 0.914   |
| Right-ICA                                                 | 241 ± 52 | 252 ± 42 | 229 ± 41   | 200 ± 47* | 205 ± 44 | 201 ± 46*  | <0.001  | 0.302 | 0.053   |
| Left-VA                                                   | 83 ± 31  | 91 ± 24  | 86 ± 40    | 78 ± 30   | 72 ± 29  | 66 ± 29†   | 0.007   | 0.633 | 0.330   |
| Right-VA                                                  | 68 ± 30  | 69 ± 31  | 57 ± 30    | 60 ± 28   | 65 ± 28  | 65 ± 30    | 0.165   | 0.757 | 0.977   |
| <i>Phase contrast magnetic resonance imaging (PC-MRI)</i> |          |          |            |           |          |            |         |       |         |
| Volumetric blood flow (mL/min)                            |          |          |            |           |          |            |         |       |         |
| Left-ICA                                                  | 231 ± 43 | 254 ± 45 | 205 ± 43   | 220 ± 48* | 193 ± 44 | 199 ± 45*  | <0.001  | 0.034 | 0.648   |
| Right-ICA                                                 | 230 ± 37 | 260 ± 42 | 206 ± 43   | 220 ± 47* | 196 ± 45 | 201 ± 42*  | <0.001  | 0.019 | 0.346   |
| Left-VA                                                   | 75 ± 30  | 99 ± 24  | 82 ± 44    | 78 ± 30   | 64 ± 29  | 62 ± 30    | <0.001  | 0.246 | 0.036   |
| Right-VA                                                  | 67 ± 31  | 80 ± 28  | 55 ± 22    | 60 ± 33*  | 60 ± 29  | 59 ± 31*   | 0.010   | 0.211 | 0.434   |

ICA: internal carotid artery; VA: vertebral artery. Data are mean ± standard deviation. Bold values represent  $p < 0.05$ . Results from one-way analysis of variance  $p < 0.05$  \* vs young;  $p < 0.05$  † vs. middle age.  $p < 0.05$  \* vs young;  $p < 0.05$  † vs. middle age.

**Table S3. Mean blood flow velocity, vessel diameter, and volumetric blood flow measured using CDUS and PC-MRI**

|       | Velocity (cm/s) |        |        |         | Diameter (mm) |        |        |         | Flow (mL/min) |         |        |         |
|-------|-----------------|--------|--------|---------|---------------|--------|--------|---------|---------------|---------|--------|---------|
|       | CDUS            |        | PC-MRI |         | CDUS          |        | PC-MRI |         | CDUS          |         | PC-MRI |         |
| L-ICA | 25.1            | ± 5.6† | 21.2   | ± 4.6*† | 4.2           | ± 0.5  | 4.7    | ± 0.5*† | 210.2         | ± 51.1  | 216.9  | ± 48.6  |
| R-ICA | 26.0            | ± 5.8  | 22.1   | ± 4.5*  | 4.2           | ± 0.5  | 4.6    | ± 0.5*  | 218.1         | ± 48.6  | 218.4  | ± 49.2  |
| L-VA  | 16.5            | ± 3.7† | 15.3   | ± 2.8†  | 3.1           | ± 0.6† | 3.2    | ± 0.6†  | 78.2          | ± 31.4† | 76.3   | ± 33.1† |
| R-VA  | 14.7            | ± 3.4  | 14.5   | ± 2.7   | 3.0           | ± 0.6  | 2.9    | ± 0.6   | 63.6          | ± 28.8  | 63.1   | ± 30.2  |
| Total |                 |        |        |         |               |        |        |         | 570.1         | ± 93.4  | 574.8  | ± 108.6 |

CDUS: color-coded duplex ultrasonography; PC-MRI: phase-contrast magnetic resonance imaging; ICA: internal carotid artery; VA: vertebral artery. Data are mean ± standard deviation. Results from paired t-test analysis \* P < 0.05 comparisons between the methods of the same vessel. † P < 0.05 comparisons between the left and right side of the vessel using the same methods.

### (A) Phase-contrast MRI

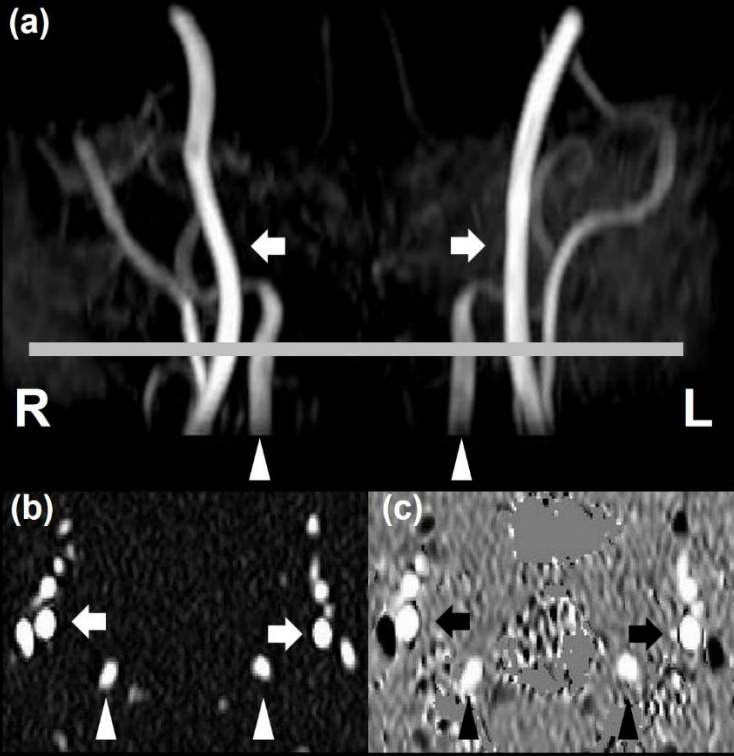

### (B) Arterial spin labeling

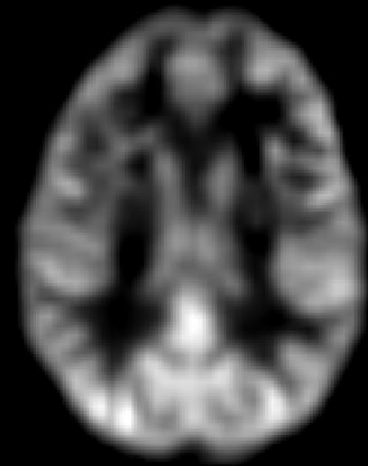

0 30 60 90 120  
Cerebral blood flow (mL/100g/min)

### (C) Color-coded duplex ultrasonography

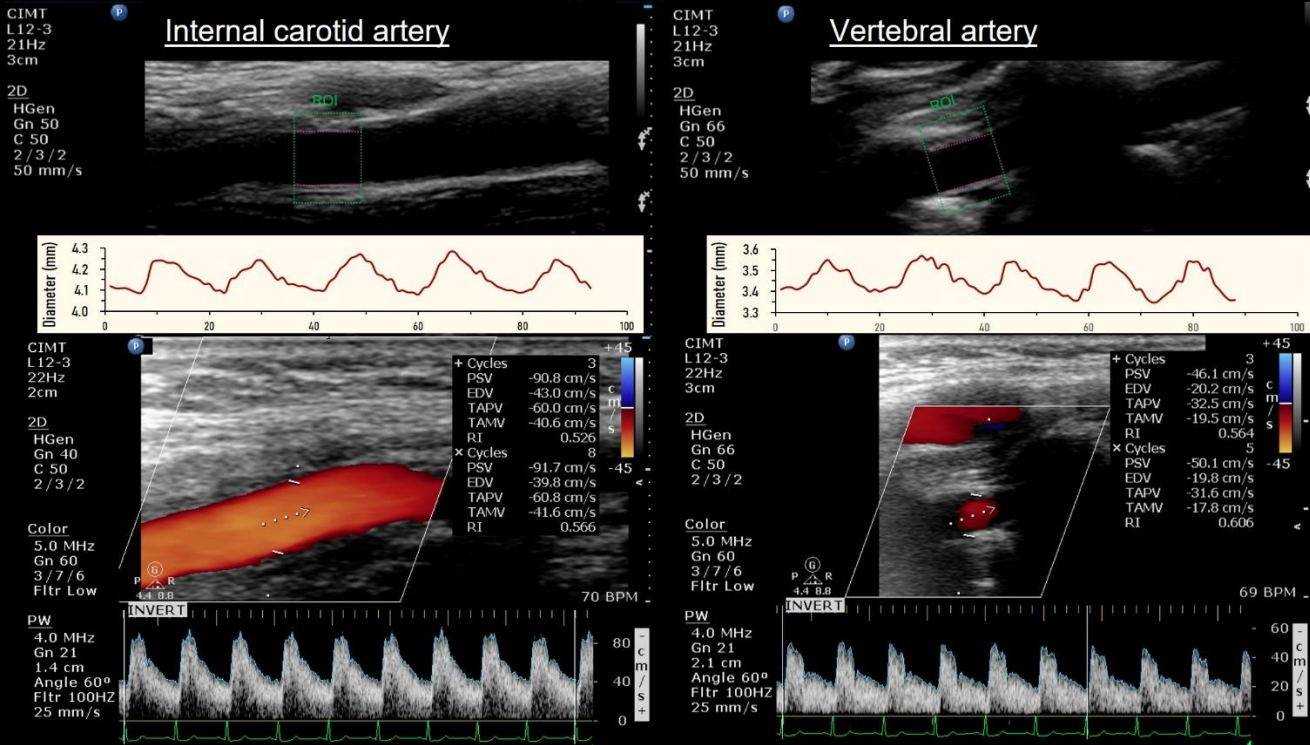

### (D) Transcranial Doppler

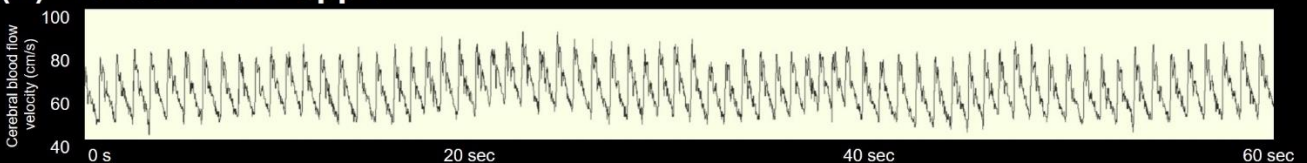

**Figure S1: Representation of images of measurement and analysis of cerebral blood flow using phase-contrast MR imaging (A), arterial spin labeling (B), color-coded duplex ultrasonography (C), and transcranial Doppler (D).** (A) (a) MR angiography of the right (R) and left (L) internal carotid (ICA: arrows) and vertebral arteries (VA: triangles), and (b) the magnitude and (c) phase velocity maps. The image data were obtained from one subject (30 years old, female). (B) Arterial spin labeling perfusion map from one subject (24 years old, male). (C) Ultrasonography image of measurement of blood flow in the right internal carotid (ICA: left panel) and the right vertebral arteries (VA: right panel) with color-coded duplex ultrasonogram. High-resolution B-mode image of the ICA and VA. Regions of interest, represented by the green rectangles are manually selected to cover a segment of the ICA or VA, the double pink lines are the detected vessel inner walls used to track the wall movements and to measure beat-by-beat pulsatile changes of vessel diameter for the ICA and VA. Beat-by-beat recordings of blood flow velocity at the sites of diameter measurements are presented for the ICA and VA. Image data were obtained from one subject (61 years old, female). (D) Representative illustration of middle cerebral artery blood flow velocity measured using transcranial Doppler. Image data were obtained from one subject (24 years old, male).

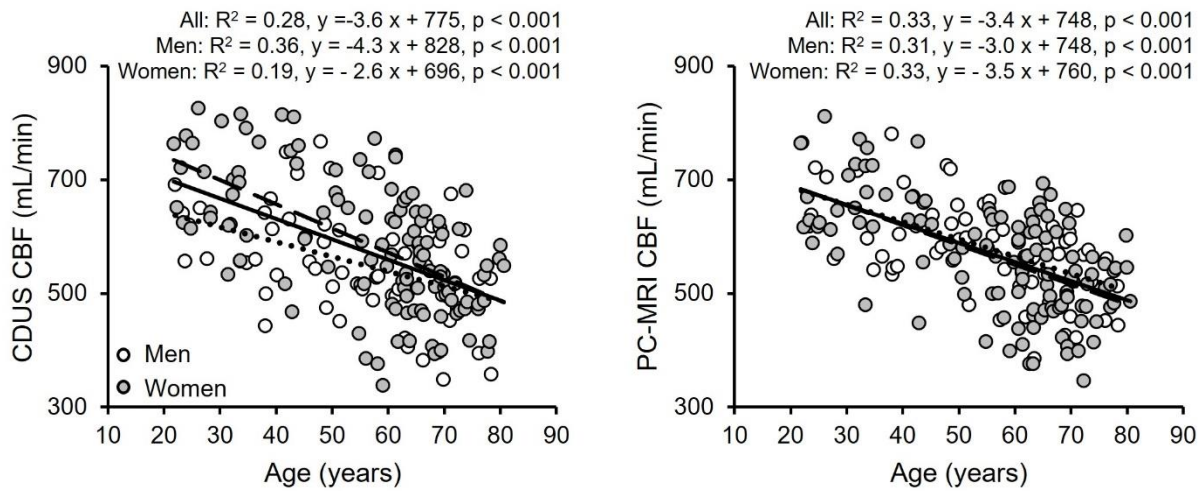

**Figure S2: Association of age with total cerebral blood flow (CBF) (not normalized by the brain tissue mass) measured by color-coded duplex ultrasonography (CDUS) and phase-contrast MRI (PC-MRI).** Solid line, dotted line, and dashed lines represent the regression equations obtained for all subjects, men, and women, respectively. The rates of decrease in CBF were similar between women and men ( $p$ -values of the interaction of age and sex in one-way analysis of covariance: CDUS CBF,  $p = 0.565$ ; PC-MRI CBF,  $p = 0.063$ ).

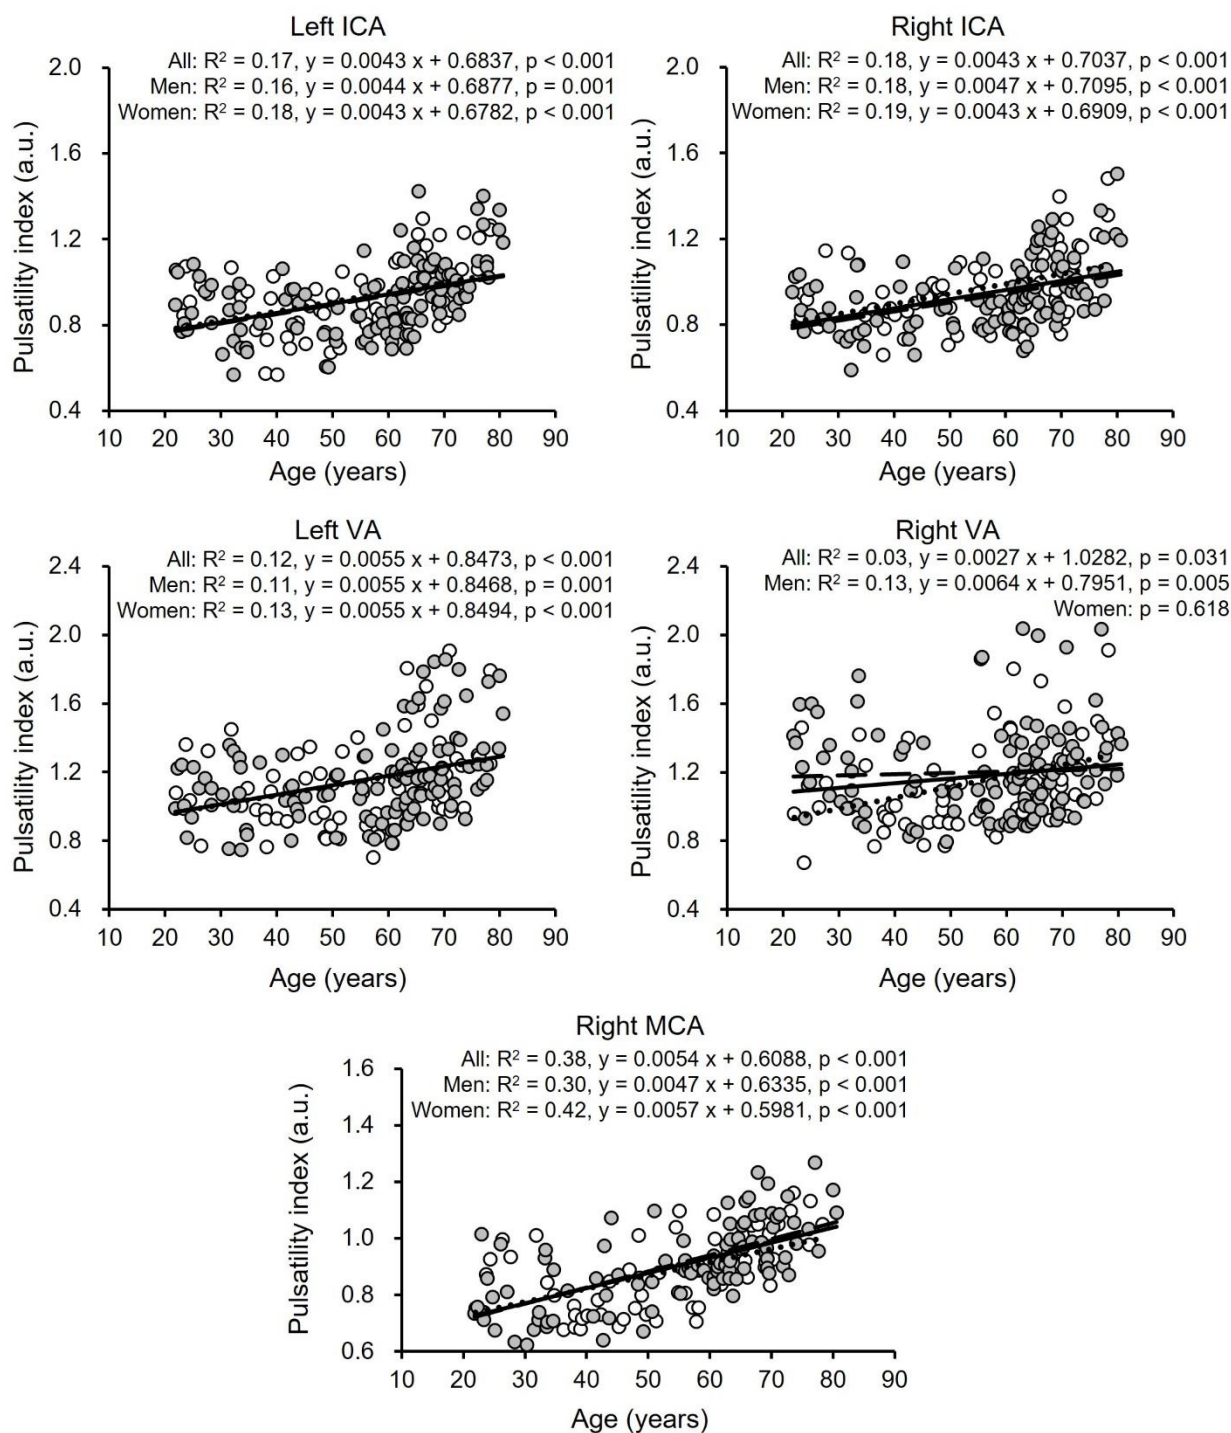

**Figure S3: Association of age with pulsatility index (PI) in the left and right internal carotid (ICA) and the vertebral (VA) arteries measured by color-coded duplex ultrasonography (CDUS) and in the right middle cerebral artery (MCA) measured by transcranial Doppler.** Solid line, dotted line, and dashed line represent the regression equations obtained for all subjects, men, and women, respectively. The rates of increases in PI were similar between women and men ( $p$ -values of the interaction of age and sex in one-way analysis of covariance: left ICA,  $p = 0.949$ ; right ICA  $p = 0.777$ ; left VA,  $p = 0.970$ ; right VA,  $p = 0.045$ , right MCA,  $p = 0.382$ ).



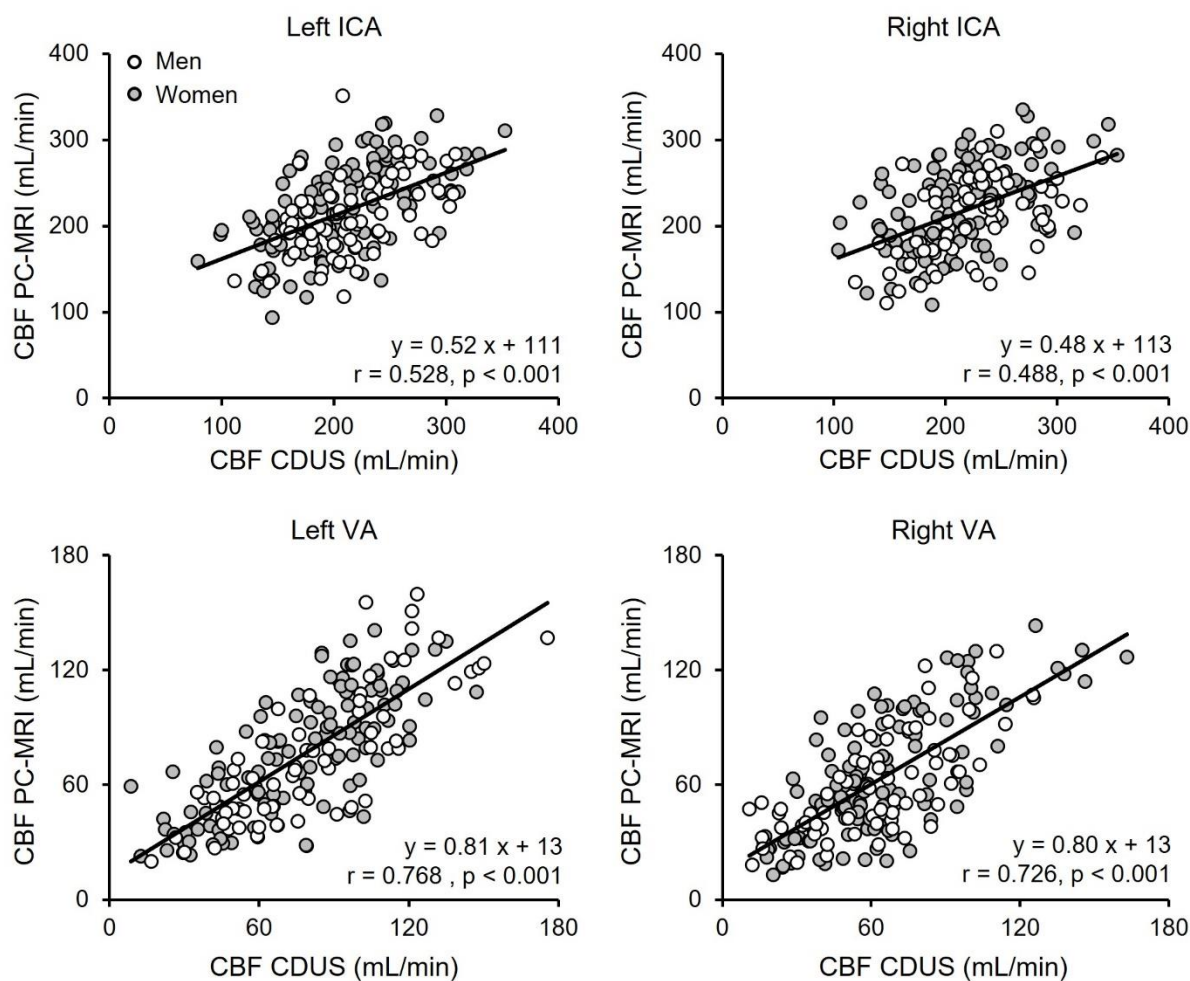

**Figure S4: Relationships between CBF measurements using CDUS and PC-MRI at the internal carotid artery (ICA) and the vertebral arteries (VA); CBF: cerebral blood flow; CDUS: color-coded duplex ultrasonography; PC-MRI: phase-contrast magnetic resonance imaging.** The correlations between the methods were similar between women and men. (p-values of the interaction of sex and method in one-way analysis of covariance: Left ICA,  $p = 0.830$ ; Right ICA,  $p = 0.895$ ; Left VA,  $p = 0.580$ ; Right VA,  $p = 0.244$ )

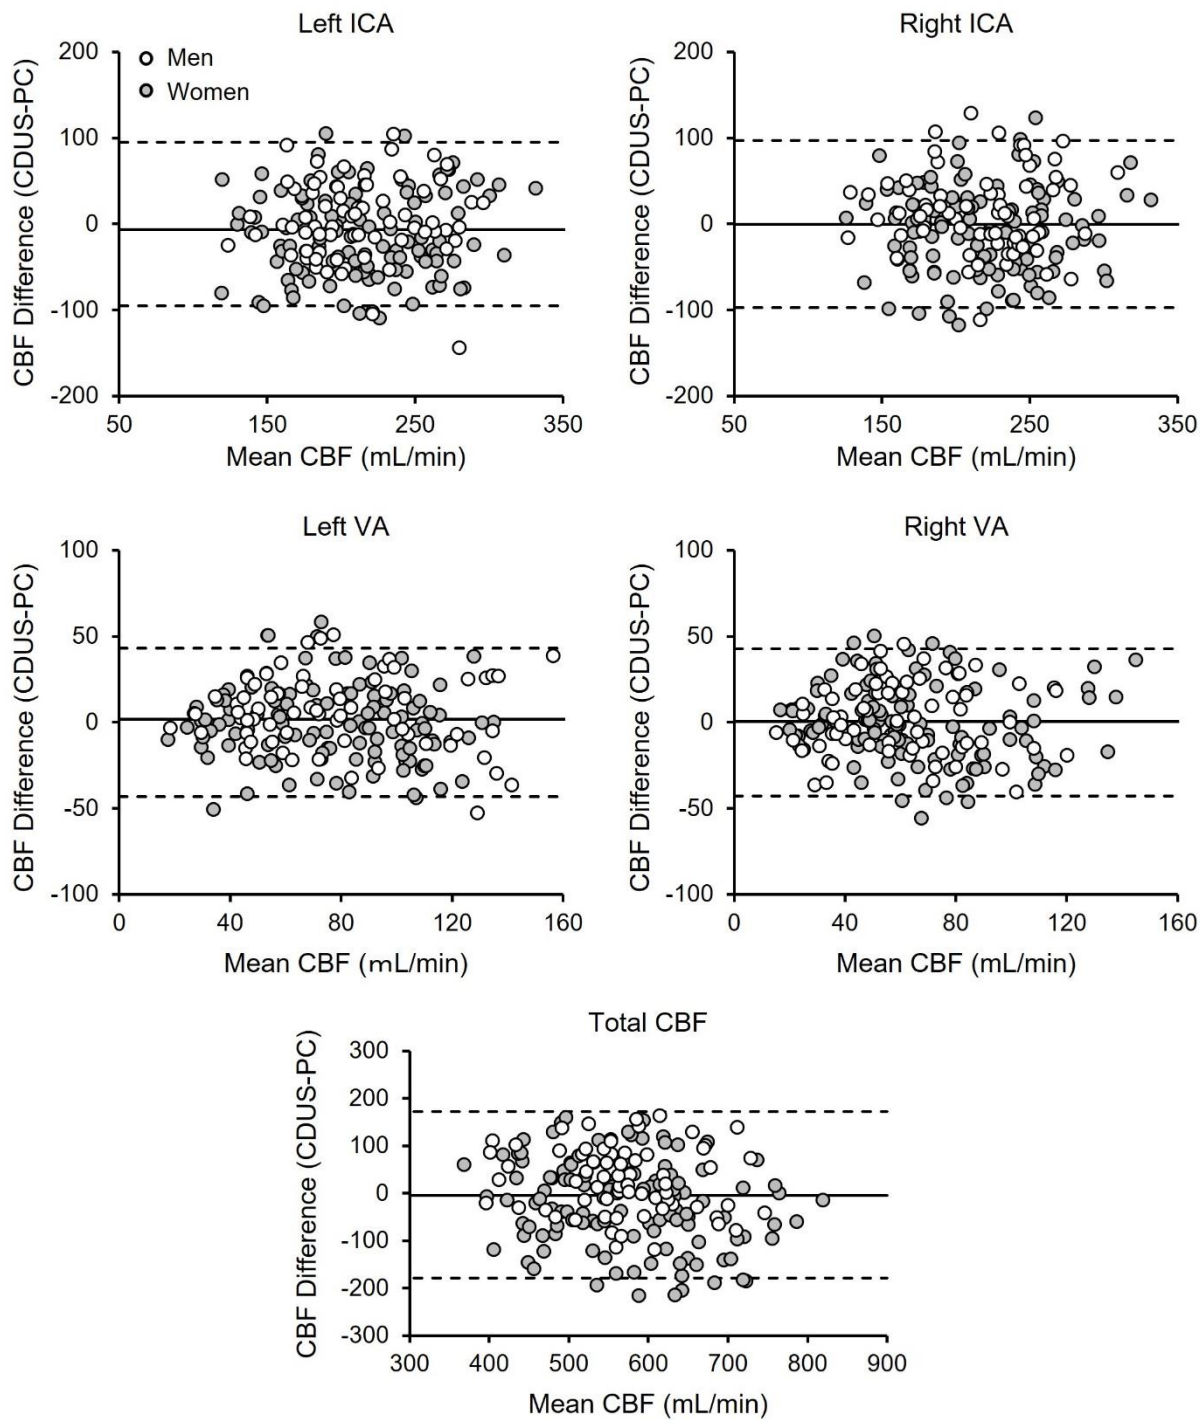

**Figure S5: Bland-Altman plots of differences in CBF measurements between CDUS and PC-MRI.** Solid line represents mean of difference between CDUs and PC-MRI. Dashed lines represent  $\pm 1.96$  of standard deviation. ICA: the internal carotid artery; VA: the vertebral artery; CBF: cerebral blood flow; CDUS: color-coded duplex ultrasonography; PC-MRI: phase contrast magnetic resonance imaging. Bland-Altman plots of differences in CBF measurements between CDUS and PC-MRI were similar between women and men.
